# Supplementary material
Source: PubMed Central journal article supplement (PMC10614114)
Supplement: NIHMS1870458-supplement-Supplemental_Table_1.pdf [file NIHMS1870458-supplement-Supplemental_Table_1.pdf]

**Supplemental Table 4.** Sensitivity analysis. Negative binomial regression results assessing incident rate ratio for each utilization category by frailty group, adjusted for age, gender, glaucoma severity, race, socioeconomic status (SES), and Gagne comorbidity score.

| <b>Supplemental Table 4: Sensitivity Analysis</b>            |                                                                      |                                                                           |                            |                                               |                                 |
|--------------------------------------------------------------|----------------------------------------------------------------------|---------------------------------------------------------------------------|----------------------------|-----------------------------------------------|---------------------------------|
| <b>Outcomes</b>                                              | <b>Incident Rate Ratio</b>                                           |                                                                           |                            |                                               |                                 |
|                                                              | <b>Mildly frail<br/>(CFI<sup>a</sup> 0.20-<br/>0.29)<sup>b</sup></b> | <b>Moderately and<br/>severely<br/>frail<br/>(CFI 0.30-1)<sup>b</sup></b> | <b>Low SES<sup>c</sup></b> | <b>Black/African<br/>American<sup>d</sup></b> | <b>Comorbidity<br/>(linear)</b> |
| Outpatient eye examinations, office visits, consultations    | 1.00 (0.98, 1.01)                                                    | 0.86 (0.83, 0.89)                                                         | 0.94 (0.93, 0.96)          | 0.93 (0.92, 0.95)                             | 1.00 (1.00, 1.00)               |
| Inpatient, emergency department encounters                   | 1.83 (1.17, 2.87)                                                    | 3.05 (1.31, 7.11)                                                         | 1.64 (0.99, 2.75)          | 2.01 (1.28, 3.15)                             | 1.11 (1.02, 1.21)               |
| Nursing facility encounters, home visits                     | 4.12 (2.41, 7.03)                                                    | 21.31 (8.46, 53.64)                                                       | 4.11 (2.27, 7.46)          | 1.47 (0.79, 2.75)                             | 1.16 (1.04, 1.30)               |
| Visual field tests                                           | 0.90 (0.88, 0.91)                                                    | 0.66 (0.63, 0.70)                                                         | 0.88 (0.87, 0.90)          | 0.96 (0.94, 0.97)                             | 0.99 (0.99, 0.99)               |
| Retinal nerve fiber layer optical coherence tomography tests | 1.01 (0.99, 1.04)                                                    | 0.76 (0.72, 0.80)                                                         | 0.89 (0.86, 0.91)          | 0.80 (0.78, 0.82)                             | 1.00 (1.00, 1.01)               |
| Glaucoma drug dispensed, days                                | 0.98 (0.93, 1.03)                                                    | 0.96 (0.87, 1.05)                                                         | 1.02 (0.97, 1.07)          | 0.98 (0.93, 1.03)                             | 0.98 (0.97, 0.99)               |
| Selective laser trabeculoplasties                            | 0.90 (0.83, 0.99)                                                    | 0.70 (0.56, 0.88)                                                         | 0.98 (0.89, 1.09)          | 0.97 (0.88, 1.06)                             | 1.01 (1.00, 1.03)               |
| Glaucoma surgeries                                           | 0.91 (0.81, 1.03)                                                    | 0.83 (0.61, 1.13)                                                         | 0.82 (0.72, 0.93)          | 1.21 (1.08, 1.35)                             | 0.98 (0.95, 1.00)               |

<sup>a</sup>Claims-based frailty index

<sup>b</sup>Relative to non-/prefrail cohort (CFI 0-0.19)

<sup>c</sup>Socioeconomic status, relative to non-low SES

<sup>d</sup>Relative to non-Hispanic White beneficiaries
